# Supplementary material for: Persulfate assisted photocatalytic degradation of tetracycline by bismuth titanate under visible light irradiation
Source: Royal Society of Chemistry journal article supplement (doi:10.1039/d2nj01404a), 2022-01-01
Supplement: d2nj01404a1.pdf [file d2nj01404a1.pdf]

**Persulfate assisted photocatalytic degradation of tetracycline by  
bismuth titanate under visible light irradiation**

Wenwen Liu\*, Changqing Wei, Renfu Peng, Runfen Chu, Hao Sun, Xiaoming Zhang,

Fang Xie\*

College of Physical Science and Engineering Technology, Yichun University, Yichun,

336000, China

\*Corresponding author. E-mail: wenwliu1212@163.com; xiefang2005@163.com

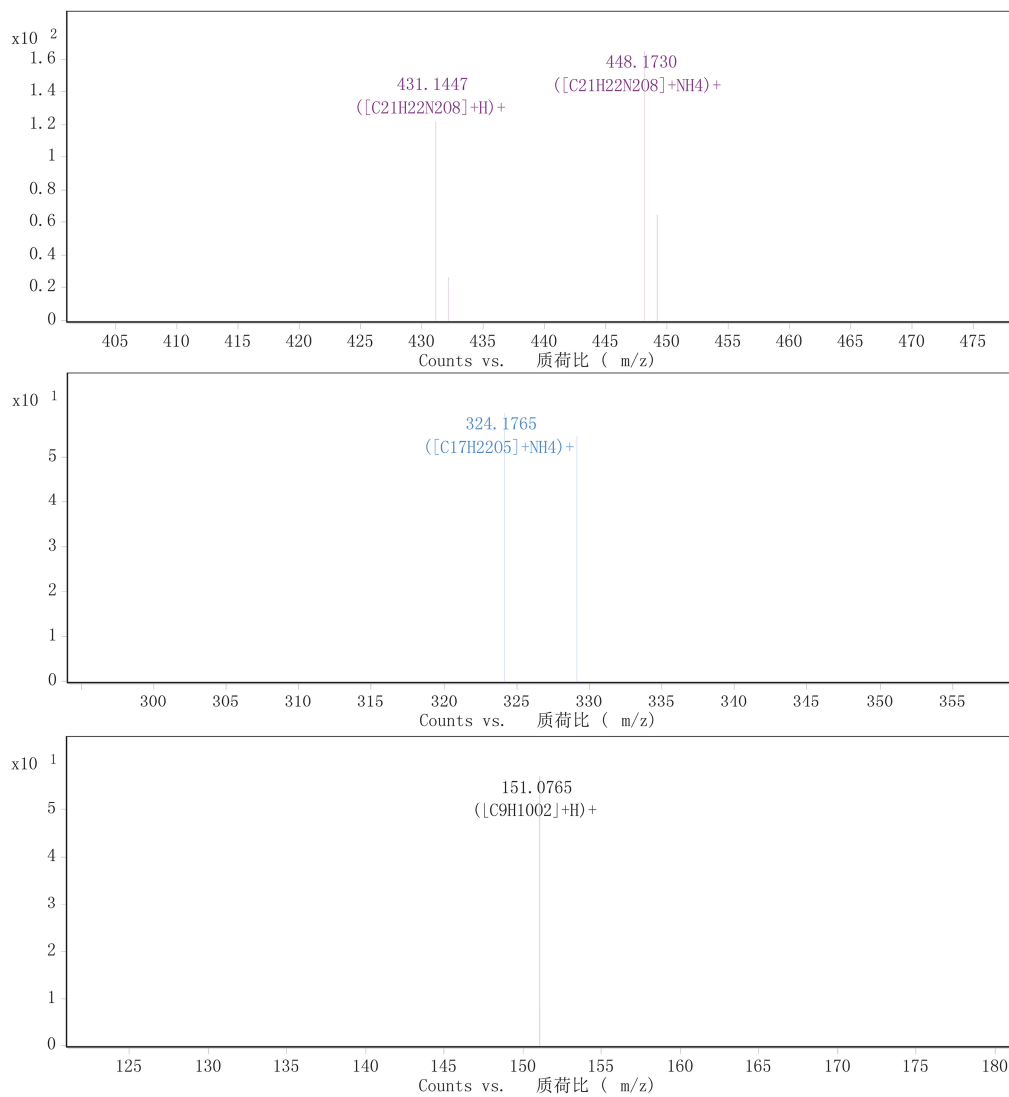

Fig. S1. MS of TC-HCl and possible intermediates of TC-HCl after visible light irradiation of 0 min.

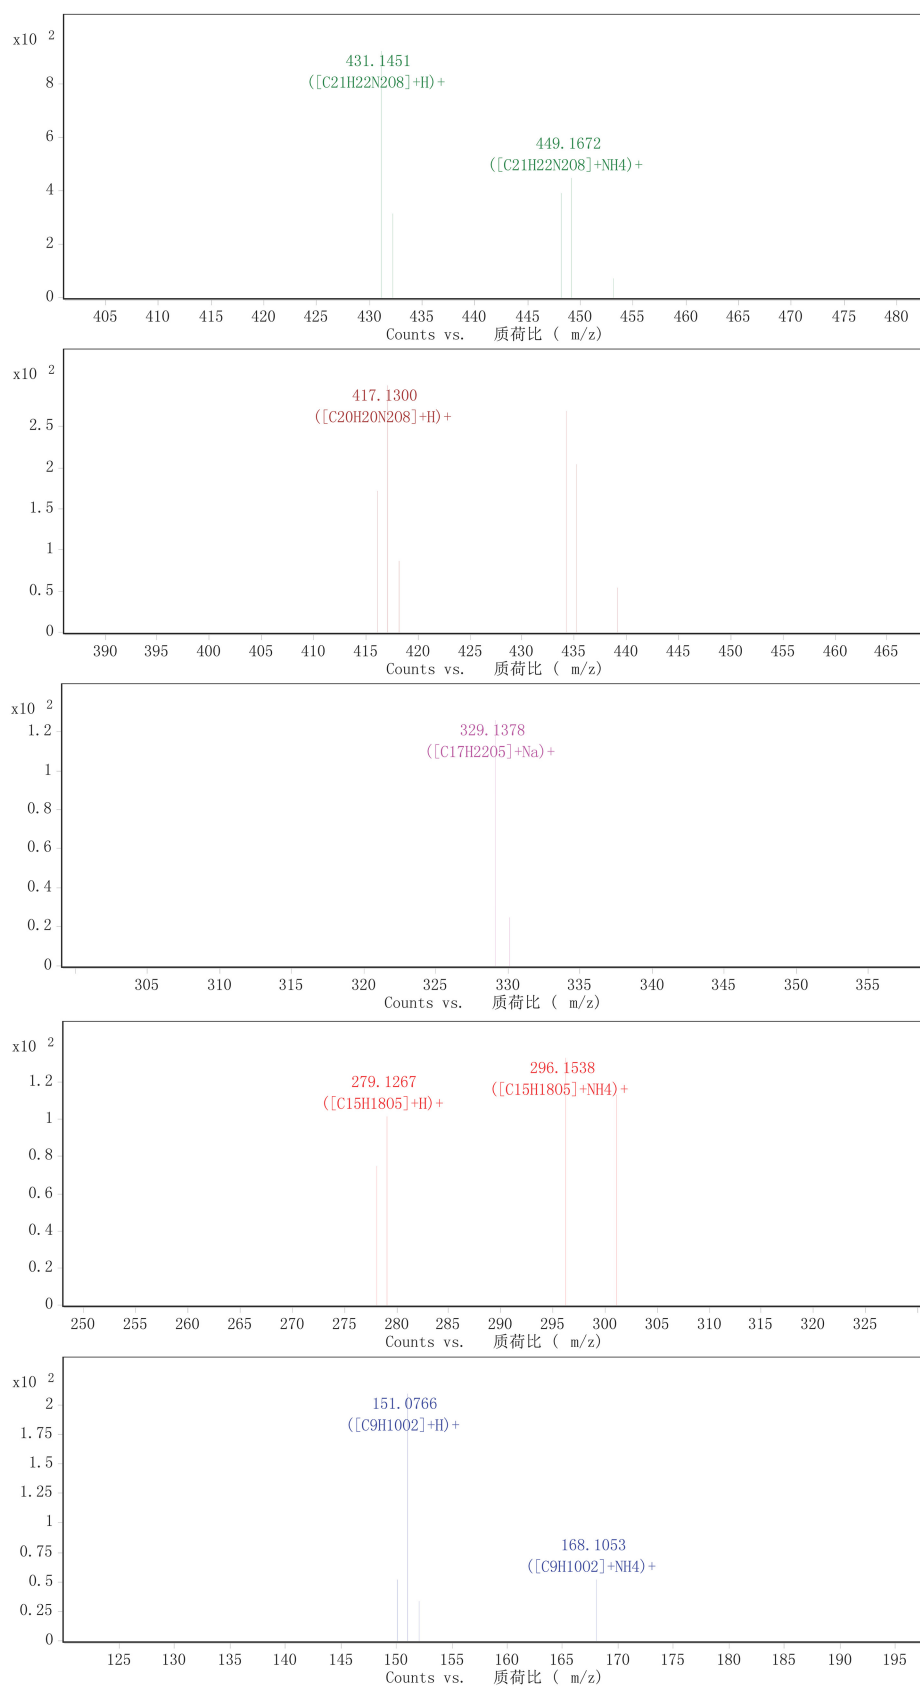

Fig. S2. MS of TC-HCl and possible intermediates of TC-HCl after visible light irradiation of 60 min.

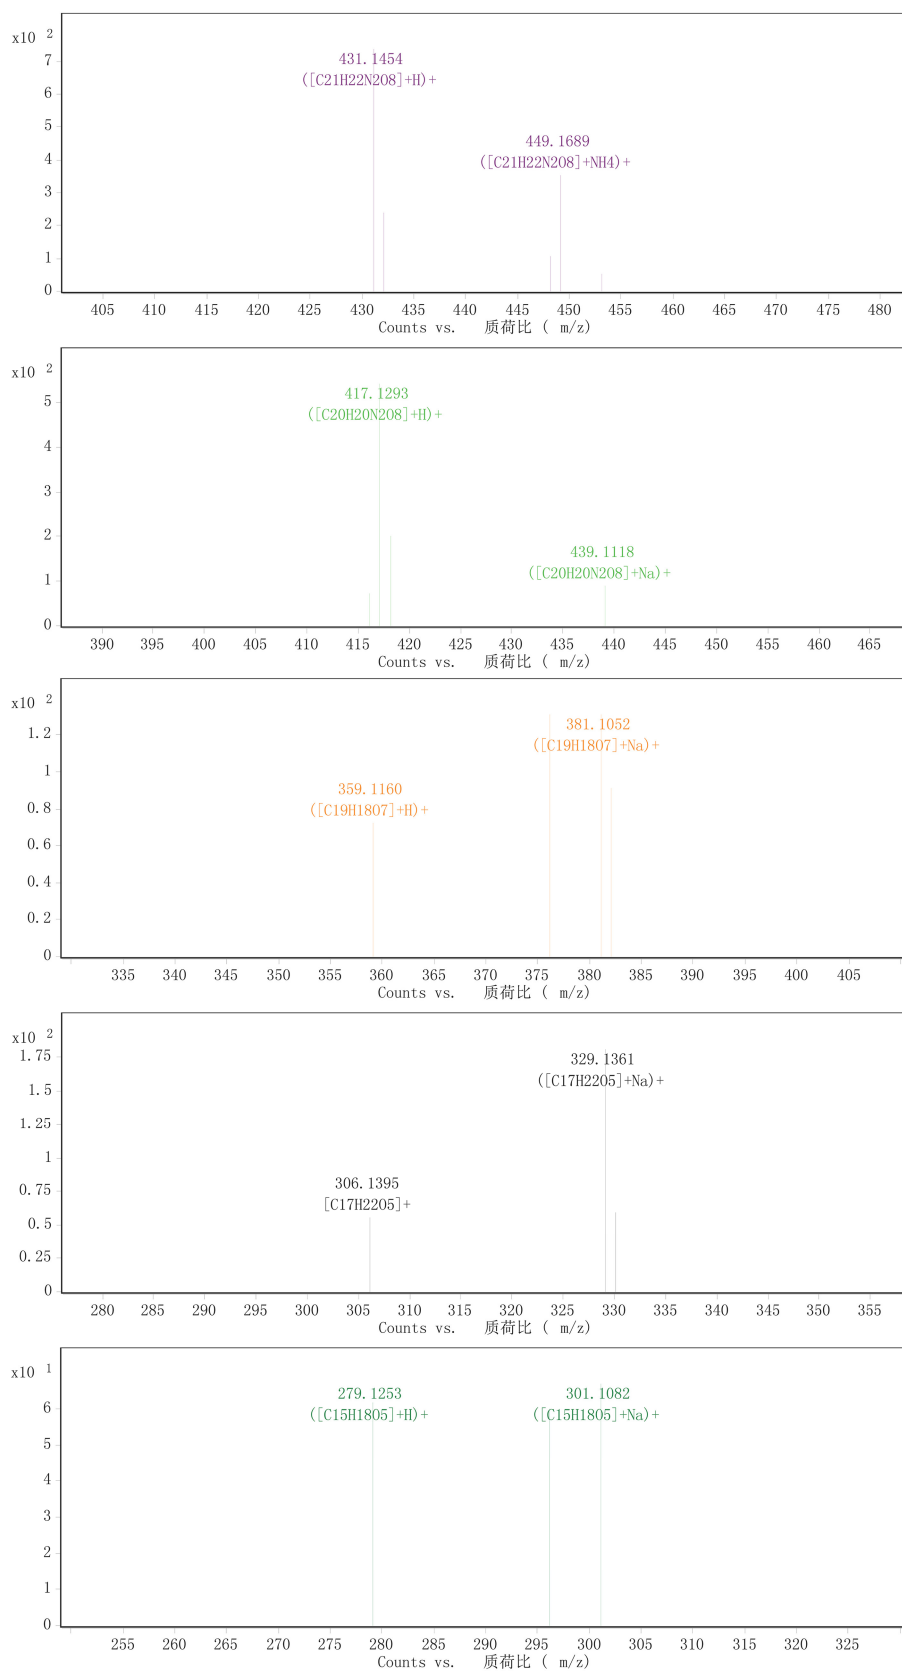

Fig. S3. MS of TC-HCl and possible intermediates of TC-HCl after visible light irradiation of 120 min.
